# Supplementary material for: Simultaneous determination of trace Cd2+ and Pb2+ using GR/l-cysteine/Bi modified screen-printed electrodes
Source: Royal Society of Chemistry journal article supplement (doi:10.1039/c8ay01676c), 2018-01-01
Supplement: c8ay01676c1.pdf [file c8ay01676c1.pdf]

### Simultaneous determination of trace $\text{Cd}^{2+}$ and $\text{Pb}^{2+}$ using GR/L-cysteine/Bi modified screen-printing Electrodes

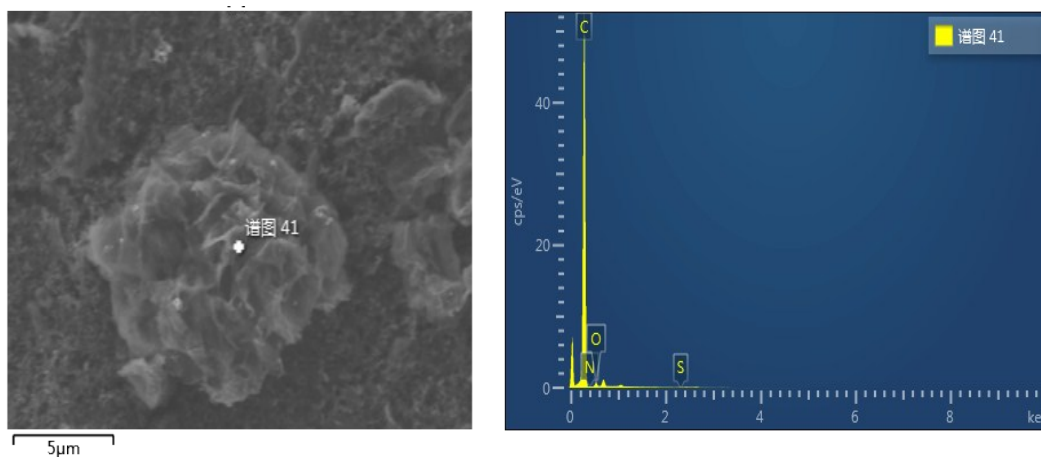

Fig. S1. Spectrum of energy dispersive x-ray (EDX) of GR/L-cys/SPE.

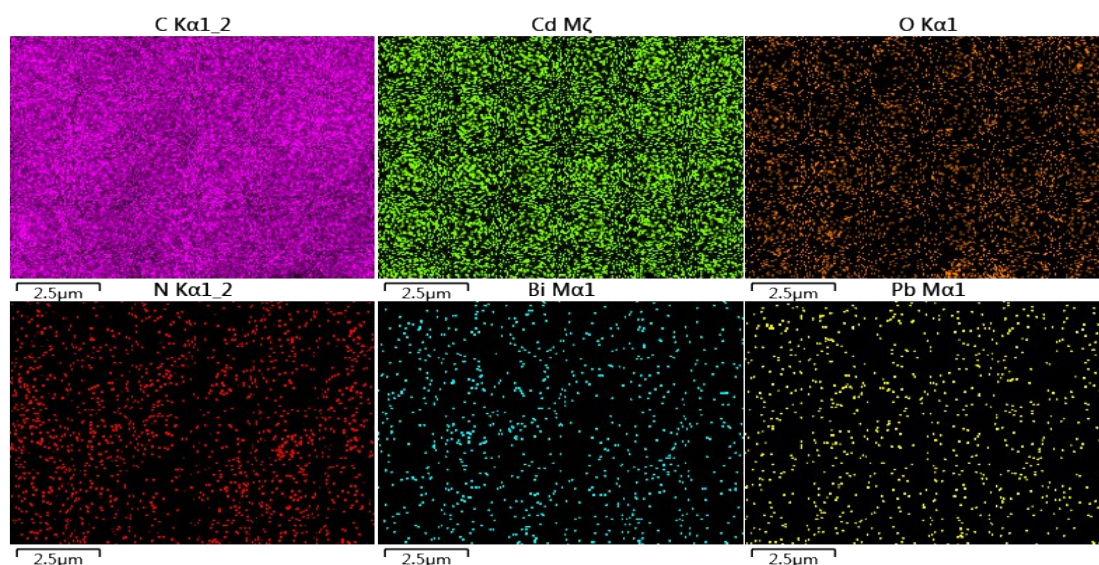

Fig. S2. Corresponding elemental mapping of GR/L-cys/Bi/SPE.
